# Supplementary material for: Long-term trends in pH in Japanese coastal seawater
Source: Copernicus journal article supplement (doi:10.5194/bg-16-4747-2019), 2019-12-16
Supplement: Supplementary file 2 [file bg-16-4747-2019-supplement.zip]

**Table S1.** Site information and slopes of pH trends for minimum and maximum data for 302 monitoring sites.

| File Number | Prefecture | Site name             | Longitude | Latitude | Slope for minimum data | Slope for maximum data |
|-------------|------------|-----------------------|-----------|----------|------------------------|------------------------|
| 0162201     | Hokkaido   | Nemuro Coast          | 145.571   | 43.279   | -2.78E-03              | -1.77E-03              |
| 0162202     |            |                       | 145.582   | 43.279   | -4.02E-03              | -9.65E-04              |
| 0260202     | Aomori     | Dai2kogyo Bay         | 141.509   | 40.550   | 1.01E-03               | 4.32E-03               |
| 0460801     | Miyagi     | Onagawa Bay           | 141.461   | 38.437   | -2.65E-03              | -5.74E-03              |
| 0460901     |            |                       | 141.477   | 38.438   | -1.10E-03              | -2.67E-03              |
| 0461051     |            | Sendai Bay            | 141.021   | 38.270   | 9.42E-04               | -2.30E-04              |
| 0461053     |            |                       | 141.029   | 38.271   | 0.00E+00               | -4.50E-03              |
| 0461055     |            |                       | 141.011   | 38.271   | 4.31E-03               | 2.53E-04               |
| 0461101     |            |                       | 141.037   | 38.259   | -9.77E-04              | -5.95E-03              |
| 0461102     |            |                       | 141.017   | 38.244   | -1.65E-03              | -5.33E-03              |
| 0461103     |            |                       | 141.058   | 38.275   | -2.38E-03              | -1.42E-03              |
| 0461151     |            |                       | 141.057   | 38.269   | -9.31E-04              | -4.14E-03              |
| 0461152     |            |                       | 141.026   | 38.253   | -2.64E-04              | -3.86E-03              |
| 0461201     |            |                       | 141.073   | 38.289   | -2.63E-03              | -2.30E-04              |
| 0461202     |            |                       | 141.058   | 38.265   | -1.52E-03              | 1.52E-03               |
| 0461203     |            |                       | 141.058   | 38.265   | -1.52E-03              | 1.52E-03               |
| 0461251     |            |                       | 141.066   | 38.268   | -2.18E-04              | -2.44E-03              |
| 0461252     |            |                       | 141.051   | 38.251   | -1.09E-03              | -3.19E-03              |
| 0461254     |            |                       | 141.006   | 38.219   | -1.19E-03              | -4.71E-03              |
| 0461255     |            |                       | 140.999   | 38.210   | -6.20E-04              | -3.13E-03              |
| 0461256     |            |                       | 141.034   | 38.249   | -1.11E-03              | -4.30E-03              |
| 0461257     |            |                       | 141.024   | 38.240   | -2.53E-04              | -4.62E-03              |
| 0461258     |            |                       | 141.016   | 38.229   | -1.00E-03              | -3.40E-03              |
| 0461501     |            | Ninokura Coast        | 140.959   | 38.097   | -2.96E-03              | -9.19E-04              |
| 0560101     | Akita      | Toga-hinan Bay        | 139.713   | 39.953   | -1.15E-03              | -1.22E-03              |
| 0760701     | Fukushima  | Yotsukura Bay         | 140.999   | 37.109   | 6.66E-04               | -8.73E-04              |
| 0760801     |            | Toyomagyo Bay         | 140.979   | 36.994   | 1.15E-04               | -1.03E-03              |
| 0760802     |            |                       | 140.981   | 37.009   | -7.12E-04              | -2.39E-03              |
| 0760901     |            | Ena Bay               | 140.960   | 36.968   | 4.37E-04               | -1.38E-04              |
| 0861601     | Ibaraki    | Joban Coast           | 140.688   | 35.922   | 3.91E-04               | -5.28E-04              |
| 1260101     | Chiba      | Chiba Bay             | 140.061   | 35.605   | 1.14E-03               | -1.98E-03              |
| 1261001     |            | Tokyo Bay             | 139.907   | 35.488   | -9.19E-05              | 5.97E-04               |
| 1261101     |            |                       | 139.780   | 35.288   | 3.13E-03               | 1.84E-04               |
| 1261151     |            |                       | 139.823   | 35.137   | 1.13E-03               | -1.13E-03              |
| 1261152     |            |                       | 139.827   | 35.088   | 7.47E-04               | -2.78E-03              |
| 1261153     |            |                       | 139.807   | 35.057   | 5.86E-04               | -1.33E-03              |
| 1261154     |            |                       | 139.817   | 35.023   | 1.61E-04               | -1.84E-03              |
| 1261155     |            |                       | 139.847   | 35.003   | -2.30E-05              | -1.61E-03              |
| 1261157     |            |                       | 139.793   | 34.983   | 6.89E-04               | -2.62E-03              |
| 1560502     | Niigata    | Ryotsu Bay            | 138.446   | 38.083   | -3.88E-03              | -5.06E-03              |
| 1560801     |            | Yahiko-Yoneyama Coast | 138.870   | 37.851   | -3.02E-03              | -3.72E-03              |
| 1560854     |            |                       | 138.719   | 37.584   | -4.37E-03              | -2.23E-03              |
| 1561001     |            | Nishikubichi Coast    | 138.097   | 37.179   | -9.54E-04              | -1.52E-03              |
| 1561101     |            |                       | 138.438   | 38.083   | -3.77E-03              | -2.87E-03              |
| 2260401     | Shizuoka   | Okusuruga Bay         | 138.632   | 35.012   | 1.75E-03               | 6.30E-03               |
| 2260404     |            | Nishi-Suruga Bay      | 138.711   | 35.068   | 2.16E-03               | 6.14E-03               |
| 2261401     |            |                       | 138.477   | 34.953   | 3.31E-03               | 4.07E-03               |
| 2261402     |            |                       | 138.424   | 34.935   | 1.37E-03               | 2.41E-03               |
| 2261802     |            | Izu Coast             | 139.079   | 35.094   | 5.86E-04               | 1.38E-04               |
| 2261803     |            |                       | 139.087   | 35.047   | 1.52E-03               | 9.42E-04               |
| 2261804     |            |                       | 139.087   | 35.057   | 3.79E-04               | 7.12E-04               |
| 2261805     |            |                       | 139.104   | 34.973   | 1.13E-03               | 1.15E-03               |
| 2360504     | Aichi      | Ise Bay               | 136.880   | 34.620   | 4.02E-04               | -5.93E-03              |
| 2460701     | Mie        | Ago Bay               | 136.822   | 34.303   | 3.14E-03               | -2.05E-03              |
| 2760401     | Osaka      | Osaka Bay             | 135.239   | 34.475   | -5.55E-03              | -9.42E-03              |
| 2760501     |            | Wakayama Coast        | 135.172   | 34.427   | -4.52E-03              | -9.35E-03              |
| 2860101     | Hyogo      | Harima Coast          | 134.995   | 34.640   | 7.58E-04               | -3.88E-03              |
| 2860201     |            |                       | 134.846   | 34.708   | 1.52E-03               | -2.14E-03              |
| 2860601     |            |                       | 134.686   | 34.766   | 5.28E-04               | 6.66E-04               |
| 2861101     |            |                       | 134.887   | 34.675   | -2.64E-04              | -4.53E-03              |
| 2861102     |            |                       | 134.841   | 34.683   | -2.99E-04              | -4.14E-03              |

|         |          |                |         |        |           |           |
|---------|----------|----------------|---------|--------|-----------|-----------|
| 2861152 |          |                | 134.744 | 34.754 | -8.16E-04 | -7.15E-03 |
| 2861201 |          |                | 135.000 | 34.633 | -1.71E-03 | -4.78E-03 |
| 2861301 |          |                | 134.942 | 34.646 | -2.09E-03 | -4.41E-03 |
| 2861302 |          |                | 134.808 | 34.648 | -2.33E-03 | -5.70E-03 |
| 2861303 |          |                | 134.686 | 34.730 | -1.64E-03 | -7.44E-03 |
| 2861354 |          |                | 134.608 | 34.733 | -5.17E-04 | -4.02E-03 |
| 2861801 |          |                | 135.087 | 34.583 | -2.62E-03 | -4.02E-03 |
| 2861802 |          |                | 135.112 | 34.533 | -2.00E-03 | -6.50E-03 |
| 2861901 |          | Sumoto Bay     | 134.900 | 34.342 | 7.05E-03  | 1.98E-03  |
| 2862001 |          |                | 134.903 | 34.342 | -2.60E-03 | -5.33E-03 |
| 2862301 |          | Harima-nada    | 134.368 | 34.700 | -3.18E-03 | -6.34E-03 |
| 2862353 |          |                | 134.467 | 34.750 | -3.01E-03 | -7.84E-03 |
| 2862357 |          |                | 134.373 | 34.725 | 9.77E-04  | -4.69E-03 |
| 2862601 |          | Tsuyama Coast  | 134.908 | 34.565 | -1.44E-03 | -4.34E-03 |
| 2862602 |          |                | 134.817 | 34.488 | -1.80E-03 | -7.12E-03 |
| 2862603 |          |                | 134.698 | 34.343 | -1.80E-03 | -7.88E-03 |
| 2862604 |          |                | 134.693 | 34.226 | -2.73E-03 | -3.79E-03 |
| 2862605 |          |                | 134.867 | 34.208 | -1.77E-03 | -6.07E-03 |
| 3060101 | Wakayama | Shimotsu Bay   | 135.125 | 34.234 | 2.46E-03  | 3.35E-03  |
| 3060301 |          |                | 135.134 | 34.215 | 6.71E-03  | 6.87E-03  |
| 3060401 |          |                | 135.199 | 34.148 | 3.26E-03  | 1.82E-03  |
| 3060501 |          |                | 135.137 | 34.116 | 1.57E-03  | 5.97E-04  |
| 3060701 |          |                | 135.101 | 34.095 | 4.48E-04  | -6.43E-04 |
| 3060804 |          |                | 135.124 | 34.212 | 3.27E-03  | 1.68E-03  |
| 3060807 |          |                | 135.119 | 34.125 | 8.04E-04  | -1.47E-03 |
| 3060851 |          |                | 135.069 | 34.256 | 3.13E-03  | 1.06E-03  |
| 3060854 |          |                | 135.117 | 34.222 | 4.25E-04  | 1.61E-03  |
| 3060855 |          |                | 135.138 | 34.193 | 9.65E-04  | -7.58E-04 |
| 3061001 |          | Miwazaki Coast | 135.979 | 33.672 | 3.87E-03  | 2.40E-03  |
| 3061101 |          |                | 135.984 | 33.671 | 4.60E-05  | 1.08E-03  |
| 3061301 |          | Wakayama Coast | 135.182 | 34.169 | 1.45E-03  | -2.30E-05 |
| 3061501 |          | Yuasawa Bay    | 135.161 | 34.032 | 7.01E-04  | 1.91E-03  |
| 3061502 |          |                | 135.149 | 34.042 | 1.62E-03  | 2.83E-03  |
| 3061503 |          |                | 135.149 | 34.025 | 3.33E-04  | 1.57E-03  |
| 3061504 |          |                | 135.090 | 33.953 | 4.12E-03  | 1.56E-03  |
| 3061505 |          |                | 135.080 | 33.952 | 5.28E-03  | 1.95E-03  |
| 3061551 |          |                | 135.173 | 34.032 | -6.33E-03 | 2.22E-03  |
| 3061801 |          | Tanaba Bay     | 135.373 | 33.717 | 4.96E-03  | 2.80E-03  |
| 3061802 |          |                | 135.359 | 33.706 | 5.91E-03  | 3.10E-03  |
| 3061851 |          |                | 135.383 | 33.706 | 5.80E-03  | 4.92E-03  |
| 3062001 |          | Katsuura Bay   | 135.935 | 33.607 | 4.94E-04  | -1.91E-03 |
| 3062054 |          |                | 135.948 | 33.615 | 2.18E-03  | -7.81E-04 |
| 3360101 | Okayama  | Mizushima Bay  | 133.745 | 34.484 | 3.19E-03  | 1.03E-03  |
| 3360154 |          |                | 133.739 | 34.508 | 8.95E-03  | 4.85E-03  |
| 3360301 |          | Tashima Bay    | 133.664 | 34.477 | 3.29E-03  | 4.09E-03  |
| 3360302 |          |                | 133.715 | 34.472 | 3.33E-03  | 3.13E-03  |
| 3360303 |          |                | 133.759 | 34.449 | 3.62E-03  | 2.25E-03  |
| 3360352 |          | Others         | 133.625 | 34.473 | 2.17E-03  | 4.23E-03  |
| 3360353 |          |                | 133.691 | 34.470 | 2.09E-03  | 4.39E-03  |
| 3360451 |          |                | 133.776 | 34.434 | 2.88E-03  | 2.57E-03  |
| 3360453 |          |                | 133.651 | 34.423 | 1.92E-03  | 2.34E-03  |
| 3360454 |          |                | 133.731 | 34.428 | 1.98E-03  | 2.87E-03  |
| 3360455 |          |                | 133.610 | 34.386 | -3.54E-03 | -3.06E-03 |
| 3360704 |          | Kojima Bay     | 134.007 | 34.529 | -1.91E-03 | -3.58E-03 |
| 3360753 |          |                | 134.041 | 34.558 | 7.47E-04  | -4.39E-03 |
| 3360801 |          | Ushimado Coast | 134.186 | 34.641 | -2.59E-03 | -3.26E-03 |
| 3360802 |          |                | 134.160 | 34.587 | -1.06E-03 | -4.11E-03 |
| 3360851 |          |                | 134.151 | 34.607 | -2.62E-03 | -4.32E-03 |
| 3360901 |          | Harima-nada    | 134.231 | 34.657 | -2.37E-03 | -2.78E-03 |
| 3360902 |          |                | 134.294 | 34.674 | -2.98E-03 | -3.15E-03 |
| 3360903 |          |                | 134.365 | 34.703 | -3.25E-03 | -4.27E-03 |
| 3360953 |          |                | 134.261 | 34.645 | -2.34E-03 | -4.50E-03 |
| 3360956 |          |                | 134.232 | 34.639 | -1.22E-03 | -4.25E-03 |
| 3361004 |          | Bisansseto     | 133.839 | 34.437 | 3.02E-03  | 3.13E-03  |
| 3361057 |          |                | 133.550 | 34.353 | -2.90E-03 | -2.50E-03 |
| 3361058 |          |                | 133.831 | 34.458 | 2.78E-03  | 3.81E-03  |

|         |           |                      |         |        |           |           |
|---------|-----------|----------------------|---------|--------|-----------|-----------|
| 3361060 |           |                      | 133.947 | 34.456 | -2.44E-03 | -4.87E-03 |
| 3361061 |           |                      | 133.961 | 34.487 | -3.46E-03 | -4.83E-03 |
| 3361062 |           |                      | 133.989 | 34.515 | -2.32E-03 | -4.89E-03 |
| 3361063 |           |                      | 133.856 | 34.457 | 2.07E-03  | 3.61E-03  |
| 3361064 |           |                      | 133.856 | 34.431 | 2.55E-03  | 2.78E-03  |
| 3460606 | Hiroshima | Kure Coast           | 132.606 | 34.211 | -2.18E-03 | -1.36E-03 |
| 3460703 |           | Akitsu-Yasuura Coast | 132.824 | 34.294 | -1.18E-03 | 1.02E-03  |
| 3460704 |           |                      | 132.848 | 34.273 | -1.15E-03 | 2.46E-03  |
| 3460705 |           |                      | 132.780 | 34.274 | -6.89E-04 | 4.37E-04  |
| 3460706 |           |                      | 132.706 | 34.227 | -7.81E-04 | -1.64E-03 |
| 3461001 |           | Hiuchi-nada          | 132.910 | 34.309 | -4.60E-05 | -9.54E-04 |
| 3461002 |           |                      | 133.037 | 34.322 | 3.96E-03  | 1.06E-03  |
| 3461003 |           |                      | 133.093 | 34.367 | 4.46E-03  | 2.00E-03  |
| 3461004 |           |                      | 133.144 | 34.380 | 3.81E-03  | 6.09E-04  |
| 3461005 |           |                      | 133.223 | 34.346 | 1.72E-03  | 5.28E-04  |
| 3461006 |           |                      | 133.318 | 34.346 | 3.39E-03  | 1.88E-03  |
| 3461402 |           | Hiroshima Bay        | 132.342 | 34.256 | -4.37E-03 | 9.88E-04  |
| 3461456 |           |                      | 132.315 | 34.199 | -6.10E-03 | -3.08E-03 |
| 3461803 |           |                      | 132.379 | 34.310 | -3.75E-03 | 4.37E-03  |
| 3560801 | Yamaguchi | Ube-Onoda Coast      | 131.239 | 33.942 | -1.03E-03 | -6.20E-03 |
| 3561202 |           |                      | 131.197 | 33.924 | -1.05E-03 | -6.09E-03 |
| 3561203 |           |                      | 131.158 | 33.970 | -2.88E-03 | -4.60E-03 |
| 3561302 |           |                      | 131.124 | 33.948 | 1.63E-03  | -5.31E-03 |
| 3563301 |           | Hibiki and Suo-nada  | 131.056 | 34.006 | -3.38E-03 | -3.45E-03 |
| 3563302 |           |                      | 131.012 | 33.986 | -1.21E-03 | -1.47E-03 |
| 3563303 |           |                      | 130.893 | 33.961 | -1.91E-03 | -8.96E-04 |
| 3563304 |           |                      | 130.892 | 34.026 | -1.80E-03 | -4.14E-04 |
| 3563352 |           |                      | 131.024 | 34.029 | -2.61E-03 | -1.59E-03 |
| 3563353 |           |                      | 131.029 | 34.005 | -2.62E-03 | -4.46E-03 |
| 3563354 |           |                      | 131.009 | 34.006 | -2.56E-03 | -3.31E-03 |
| 3563356 |           |                      | 130.932 | 33.947 | -1.40E-03 | -1.24E-03 |
| 3563358 |           |                      | 130.900 | 33.919 | -2.99E-04 | -9.88E-04 |
| 3563359 |           |                      | 130.893 | 33.936 | -1.49E-03 | -7.58E-04 |
| 3563361 |           |                      | 130.899 | 33.952 | -9.88E-04 | -1.24E-03 |
| 3563363 |           |                      | 130.908 | 34.011 | -1.84E-03 | -1.06E-03 |
| 3563365 |           |                      | 130.867 | 33.955 | -1.42E-03 | -7.35E-04 |
| 3563366 |           |                      | 130.923 | 33.913 | -1.19E-03 | -1.22E-03 |
| 3563501 |           | Hiroshima Bay        | 132.250 | 34.191 | -2.14E-03 | -5.93E-03 |
| 3660201 | Tokushima | Tomioka Bay          | 134.599 | 34.008 | 5.40E-04  | 5.97E-04  |
| 3660301 |           | Komatsushima Bay     | 134.608 | 33.998 | -2.38E-03 | -2.27E-03 |
| 3660601 |           | Tsubakidomari Bay    | 134.712 | 33.835 | -1.02E-03 | -2.71E-03 |
| 3660602 |           |                      | 134.727 | 33.838 | -1.87E-03 | -3.22E-04 |
| 3660701 |           | Kennan Coast         | 134.757 | 33.797 | -2.18E-04 | -8.73E-04 |
| 3660702 |           |                      | 134.537 | 33.673 | -1.84E-04 | -8.96E-04 |
| 3660703 |           |                      | 134.367 | 33.543 | -1.47E-03 | -1.49E-03 |
| 3660801 |           | Kenhoku Coast        | 134.483 | 34.265 | -8.04E-05 | -2.02E-03 |
| 3660802 |           |                      | 134.593 | 34.265 | -1.59E-03 | -1.86E-03 |
| 3660803 |           |                      | 134.597 | 34.210 | -2.23E-03 | -1.52E-03 |
| 3660804 |           |                      | 134.667 | 34.200 | -1.85E-03 | -2.76E-04 |
| 3660902 |           | Kisuido Coast        | 134.683 | 34.033 | -5.97E-04 | -2.94E-03 |
| 3660903 |           |                      | 134.750 | 33.933 | -1.18E-03 | -1.61E-03 |
| 3760102 | Kagawa    | Bisenseto            | 133.944 | 34.432 | -2.88E-03 | -2.71E-03 |
| 3760103 |           |                      | 134.076 | 34.371 | -1.03E-03 | -2.64E-03 |
| 3760104 |           |                      | 133.997 | 34.377 | -2.44E-03 | -2.19E-03 |
| 3760105 |           |                      | 133.874 | 34.367 | -2.93E-03 | -1.61E-03 |
| 3760106 |           |                      | 133.778 | 34.321 | -3.31E-03 | -2.31E-03 |
| 3760107 |           |                      | 133.703 | 34.278 | -4.60E-04 | -2.06E-03 |
| 3760108 |           |                      | 133.578 | 34.280 | -6.20E-04 | -5.65E-03 |
| 3760402 |           | Sakaide Bay          | 133.858 | 34.334 | 1.14E-03  | 3.68E-04  |
| 3760403 |           |                      | 133.842 | 34.331 | 3.27E-03  | 7.81E-04  |
| 3760601 |           | Hiuchi-nada          | 133.581 | 34.228 | -6.62E-03 | -1.03E-02 |
| 3760603 |           |                      | 133.606 | 34.153 | -3.49E-03 | -8.48E-03 |
| 3760604 |           |                      | 133.604 | 34.103 | -3.50E-03 | -7.24E-03 |
| 3760651 |           |                      | 133.550 | 34.064 | -1.48E-03 | -8.16E-03 |
| 3760652 |           |                      | 133.512 | 34.081 | -8.50E-04 | -8.09E-03 |
| 3760653 |           |                      | 133.558 | 34.197 | 8.39E-04  | -7.86E-03 |

|         |       |                      |         |        |           |           |
|---------|-------|----------------------|---------|--------|-----------|-----------|
| 3760654 |       |                      | 133.610 | 34.073 | -3.85E-03 | -8.13E-03 |
| 3760703 |       | Tosan Coast          | 134.288 | 34.301 | -6.32E-04 | -3.40E-03 |
| 3760705 |       |                      | 134.114 | 34.392 | -4.83E-04 | -2.21E-03 |
| 3760706 |       |                      | 134.276 | 34.454 | -8.62E-04 | -3.58E-03 |
| 3760707 |       |                      | 134.311 | 34.438 | -3.22E-04 | -4.37E-03 |
| 3760709 |       |                      | 134.351 | 34.447 | -1.08E-03 | -4.92E-03 |
| 3760710 |       |                      | 134.216 | 34.549 | 3.22E-04  | -4.14E-03 |
| 3760711 |       |                      | 134.148 | 34.497 | 1.38E-04  | -2.11E-03 |
| 3760712 |       |                      | 134.208 | 34.451 | -6.43E-04 | -3.35E-03 |
| 3860501 | Ehime | Iyomishima-doi Coast | 133.483 | 33.978 | 1.54E-03  | -3.72E-03 |
| 3860502 |       |                      | 133.450 | 33.989 | -2.26E-03 | -3.33E-03 |
| 3860504 |       |                      | 133.474 | 33.990 | -1.08E-03 | -3.63E-03 |
| 3860505 |       |                      | 133.436 | 33.996 | -1.37E-03 | -3.08E-03 |
| 3860801 |       | Niihama Bay          | 133.294 | 33.979 | -4.79E-03 | -3.17E-03 |
| 3860901 |       |                      | 133.267 | 33.981 | -1.76E-03 | -4.43E-03 |
| 3860902 |       |                      | 133.246 | 33.968 | -2.55E-03 | -4.83E-03 |
| 3861001 |       |                      | 133.381 | 33.986 | -3.50E-03 | -4.50E-03 |
| 3861002 |       |                      | 133.364 | 33.983 | -3.03E-03 | -5.01E-03 |
| 3861003 |       |                      | 133.336 | 33.989 | -2.91E-03 | -3.01E-03 |
| 3861005 |       |                      | 133.267 | 33.989 | -3.64E-03 | -3.49E-03 |
| 3861701 |       | Toyo Coast           | 133.117 | 33.942 | 7.70E-04  | -2.92E-03 |
| 3861801 |       |                      | 133.092 | 33.947 | 1.15E-03  | -3.08E-03 |
| 3862001 |       | Kawarazu-gyoko Bay   | 133.074 | 33.969 | 1.28E-03  | -4.96E-03 |
| 3862807 |       | Iyo-nada Coast       | 132.800 | 34.011 | 3.83E-03  | -2.84E-03 |
| 3862809 |       |                      | 132.767 | 33.950 | 1.29E-03  | -3.42E-03 |
| 3862810 |       |                      | 132.751 | 33.908 | -1.37E-03 | -6.11E-03 |
| 3862811 |       |                      | 132.733 | 33.906 | 1.02E-03  | -6.34E-03 |
| 3862812 |       |                      | 132.705 | 33.889 | -6.55E-04 | -5.77E-03 |
| 3862813 |       |                      | 132.707 | 33.867 | 4.60E-05  | -4.80E-03 |
| 3862814 |       |                      | 132.697 | 33.843 | 3.79E-04  | -5.49E-03 |
| 3862815 |       |                      | 132.689 | 33.833 | -1.11E-03 | -3.93E-03 |
| 3862816 |       |                      | 132.686 | 33.814 | 2.56E-03  | -5.84E-03 |
| 3862817 |       |                      | 132.682 | 33.797 | -1.15E-05 | -2.05E-03 |
| 3862818 |       |                      | 132.686 | 33.783 | -1.19E-03 | -1.72E-03 |
| 3862819 |       |                      | 132.689 | 33.764 | -1.21E-03 | -4.60E-04 |
| 3862820 |       |                      | 132.675 | 33.742 | -5.06E-04 | -2.62E-03 |
| 3862822 |       |                      | 132.579 | 33.654 | -8.62E-04 | -1.40E-03 |
| 3862824 |       |                      | 132.500 | 33.625 | -1.72E-03 | -2.69E-03 |
| 3862825 |       |                      | 132.472 | 33.612 | -2.07E-03 | -2.76E-03 |
| 3862826 |       |                      | 132.458 | 33.600 | -3.06E-03 | -4.09E-03 |
| 3862827 |       |                      | 132.306 | 33.487 | -1.06E-03 | -2.44E-03 |
| 3862828 |       |                      | 132.260 | 33.456 | -1.07E-03 | -3.63E-03 |
| 3862829 |       |                      | 132.135 | 33.406 | -2.36E-03 | -2.64E-03 |
| 3863102 |       | Uwajima Bay          | 132.225 | 33.417 | -1.11E-03 | -2.90E-03 |
| 3863103 |       |                      | 132.304 | 33.469 | -3.56E-04 | -3.91E-03 |
| 3863104 |       |                      | 132.352 | 33.482 | -2.37E-03 | -2.96E-03 |
| 3863105 |       |                      | 132.355 | 33.478 | -3.39E-03 | -2.53E-03 |
| 3863108 |       |                      | 132.382 | 33.449 | -4.38E-03 | -1.52E-03 |
| 3863109 |       |                      | 132.415 | 33.455 | -2.13E-03 | -1.42E-03 |
| 3863110 |       |                      | 132.400 | 33.449 | -2.90E-03 | -1.86E-03 |
| 3863111 |       |                      | 132.413 | 33.372 | 1.03E-04  | -2.23E-03 |
| 3863113 |       |                      | 132.417 | 33.354 | 9.54E-04  | -3.01E-03 |
| 3863126 |       |                      | 132.474 | 33.030 | -9.19E-05 | 1.84E-04  |
| 3863127 |       |                      | 132.496 | 32.997 | 7.12E-04  | -1.38E-04 |
| 3863130 |       |                      | 132.528 | 32.938 | -2.07E-04 | 8.73E-04  |
| 3863131 |       |                      | 132.522 | 32.922 | 8.04E-04  | 1.19E-03  |
| 3863132 |       |                      | 132.561 | 32.922 | 5.97E-04  | -5.28E-04 |
| 3863133 |       |                      | 132.580 | 32.929 | -4.37E-04 | 6.89E-05  |
| 3863201 |       | Hiuchi-nada          | 133.071 | 34.033 | -3.13E-03 | -5.15E-03 |
| 3863202 |       |                      | 133.083 | 34.080 | -5.35E-03 | -6.09E-03 |
| 3863203 |       |                      | 133.017 | 34.083 | -5.09E-03 | -6.27E-03 |
| 3863204 |       |                      | 132.958 | 34.133 | -4.73E-03 | -5.33E-03 |
| 3863205 |       |                      | 132.917 | 34.135 | -5.38E-03 | -5.70E-03 |
| 3960301 | Kochi | Ashizurikaichuukouen | 132.844 | 32.780 | -2.88E-03 | -9.28E-03 |
| 3960302 |       |                      | 132.847 | 32.773 | -3.66E-03 | -9.44E-03 |
| 3960304 |       |                      | 132.855 | 32.781 | -4.10E-03 | -8.41E-03 |

|         |          |                              |         |        |           |           |
|---------|----------|------------------------------|---------|--------|-----------|-----------|
| 3960305 |          |                              | 132.869 | 32.775 | -3.90E-03 | -8.10E-03 |
| 3960601 |          | Sukumo Bay                   | 132.705 | 32.907 | 1.25E-03  | -2.92E-03 |
| 3960701 |          |                              | 132.671 | 32.898 | -2.41E-04 | -5.74E-03 |
| 3960801 |          | Nakato Coast                 | 134.007 | 33.415 | -4.16E-03 | -1.41E-02 |
| 3960802 |          |                              | 133.756 | 33.531 | 1.84E-04  | -2.60E-03 |
| 3960901 |          | Ashizuriuwakaikokuritsukouen | 132.965 | 32.852 | -2.95E-03 | -7.63E-03 |
| 3960902 |          |                              | 132.979 | 32.721 | -4.99E-03 | -1.08E-02 |
| 3960903 |          |                              | 132.949 | 32.762 | -4.66E-03 | -8.39E-03 |
| 4160503 | Saga     | Imari Bay                    | 129.821 | 33.316 | 2.47E-03  | -1.70E-03 |
| 4260902 | Nagasaki | Nagasaki Bay                 | 129.849 | 32.721 | 1.38E-04  | -3.45E-03 |
| 4261001 |          |                              | 129.830 | 32.696 | -7.47E-04 | -2.62E-03 |
| 4261002 |          |                              | 129.824 | 32.713 | -1.14E-03 | -3.03E-03 |
| 4261051 |          |                              | 129.840 | 32.724 | -1.05E-03 | -4.55E-03 |
| 4261102 |          | Haikiseto                    | 129.753 | 33.139 | -2.76E-04 | -7.63E-03 |
| 4261253 |          | Sasebo Bay                   | 129.718 | 33.138 | -1.55E-03 | -4.83E-04 |
| 4261301 |          |                              | 129.734 | 33.121 | -1.83E-03 | -4.80E-03 |
| 4261401 |          | Omura Bay                    | 129.794 | 33.035 | -4.18E-03 | -8.18E-03 |
| 4261404 |          |                              | 129.788 | 33.079 | -3.50E-03 | -7.93E-03 |
| 4261405 |          |                              | 129.864 | 33.057 | -9.54E-04 | -8.11E-03 |
| 4261407 |          |                              | 129.921 | 32.955 | -3.29E-03 | -6.85E-03 |
| 4261408 |          |                              | 129.920 | 32.937 | -3.07E-03 | -6.30E-03 |
| 4261409 |          |                              | 129.946 | 32.900 | -4.43E-03 | -7.17E-03 |
| 4261412 |          |                              | 129.957 | 32.869 | -1.31E-03 | -3.15E-03 |
| 4261413 |          |                              | 129.865 | 32.852 | -1.71E-03 | -6.11E-03 |
| 4261415 |          |                              | 129.842 | 32.846 | -2.69E-03 | -4.83E-03 |
| 4261417 |          |                              | 129.749 | 33.017 | -3.27E-03 | -5.84E-03 |
| 4261501 |          | Aba Bay                      | 129.962 | 32.748 | -1.21E-03 | -2.71E-03 |
| 4261502 |          |                              | 129.958 | 32.763 | 1.53E-03  | -3.95E-03 |
| 4261551 |          |                              | 129.974 | 32.761 | -2.30E-05 | -5.42E-03 |
| 4261601 |          | Tsushima Coast               | 129.395 | 34.640 | 1.15E-03  | 8.27E-04  |
| 4261602 |          |                              | 129.466 | 34.654 | 1.06E-03  | -1.29E-03 |
| 4261604 |          |                              | 129.302 | 34.301 | 9.88E-04  | -1.24E-03 |
| 4261605 |          |                              | 129.292 | 34.197 | -4.83E-04 | -1.38E-04 |
| 4261704 |          | Iki Coast                    | 129.756 | 33.810 | -1.01E-02 | -2.92E-03 |
| 4261801 |          | Goshima Coast                | 129.109 | 32.986 | -9.01E-03 | -3.75E-03 |
| 4261802 |          |                              | 129.056 | 32.980 | -4.48E-03 | -3.38E-03 |
| 4261804 |          |                              | 129.031 | 32.892 | -5.86E-03 | -2.21E-03 |
| 4261805 |          |                              | 129.061 | 32.846 | -5.64E-03 | -2.87E-03 |
| 4261904 |          | Matsuura Coast               | 129.800 | 33.343 | -3.71E-03 | -9.88E-04 |
| 4262106 |          | Seihikai Coast               | 129.638 | 32.938 | -4.04E-03 | -3.91E-03 |
| 4262109 |          |                              | 129.813 | 32.656 | -3.15E-03 | -2.76E-03 |
| 4262111 |          |                              | 129.816 | 32.683 | -2.06E-03 | -2.50E-03 |
| 4262201 |          | Tacjobama Bay                | 129.785 | 32.586 | -4.39E-03 | -4.02E-03 |
| 4262203 |          |                              | 129.918 | 32.705 | -2.16E-03 | -2.09E-03 |
