# Supplementary material for: Long-term trends in pH in Japanese coastal seawater
Source: Copernicus journal article supplement (doi:10.5194/bg-16-4747-2019), 2019-12-16
Supplement: Supplementary file 3 [file bg-16-4747-2019-supplement.zip]

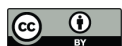

## *Supplement of*

# **Long-term trends in pH in Japanese coastal seawater**

**Miho Ishizu et al.**

*Correspondence to:* Miho Ishizu ([mishizu@jamstec.go.jp](mailto:mishizu@jamstec.go.jp))

- [bg-16-4747-2019-supplement-title-page.pdf](#)
- [Fig. S1.pdf](#)
- [Table S1.pdf](#)

The copyright of individual parts of the supplement might differ from the CC BY 4.0 License.
