# Supplementary material for: Long-term trends in pH in Japanese coastal seawater
Source: Copernicus journal article supplement (doi:10.5194/bg-16-4747-2019), 2019-12-16
Supplement: Supplementary file 4 [file bg-16-4747-2019-supplement.zip]

Archive with 3 entries (3 files):
- bg-16-4747-2019-supplement-title-page.pdf
- Table S1.pdf
- Fig. S1.pdf
